# Supplementary material for: Identification of Modulators of the C. elegans Aryl Hydrocarbon Receptor and Characterization of Transcriptomic and Metabolic AhR-1 Profiles
Source: MDPI journal article supplement (doi:10.3390/antiox11051030), 2022-05-23
Supplement: s1 [file s1]

## Supplementary data and tables

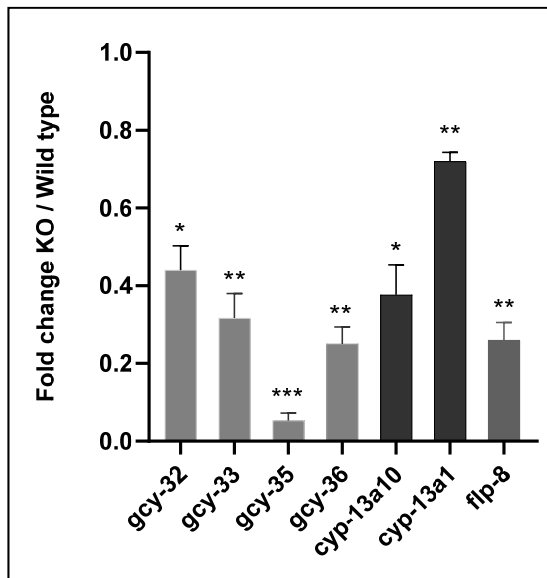

**Figure S1.** Fold change of *ahr-1* KO / Wild type condition of selected genes as measured with real-time qPCR. The qPCR was performed for three independent biological replicates. Values are expressed as mean  $\pm$  s.e.m. t-test *p*-value \*  $P < 0,05$ , \*\*  $P < 0,01$ , \*\*\*  $P < 0,001$ .

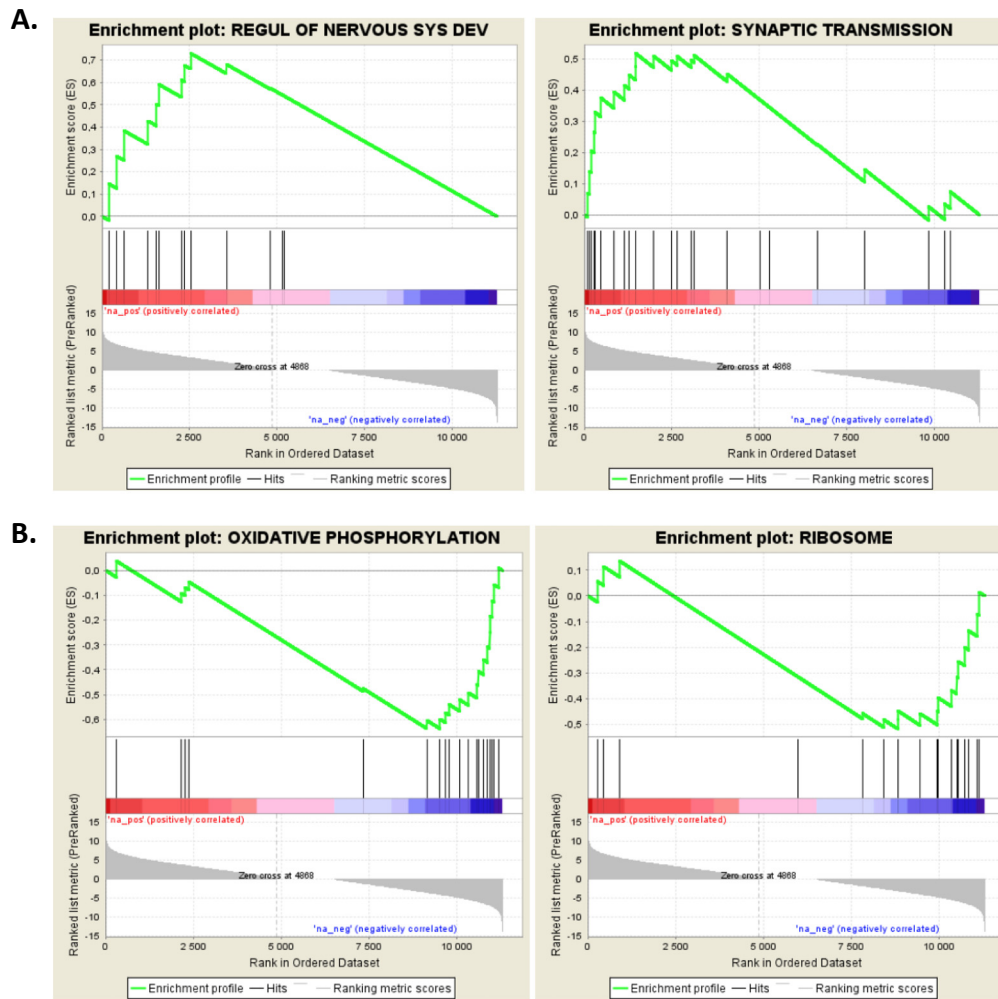

**Figure S2.** Gene set enrichment analysis plot. GSEA plot shows that (A) the most important depleted groups of genes found in *ahr-1* KO neurons belonged to nervous system functions and (B) that gene sets associated with oxidative phosphorylation and ribosome were significantly enriched in KO neurons (The same results were observed with fatty acid process and glycolysis). The data were grouped into wild type condition (*na\_pos*) and KO condition (*na\_neg*). The left half of each graph (red portion) shows the positive correlation with the AHR-1 wild type pattern.

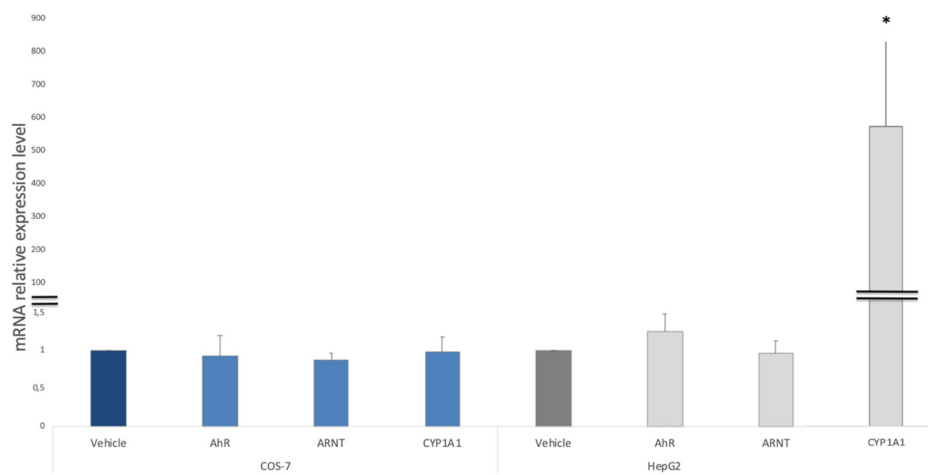

**Figure S3:** mRNA relative expression level in different cell lines. Cos-7 (blue) or HepG2 (gray, used as positive control) cells were treated with TCDD 24 hours before RNA extraction. mRNA expression levels were evaluated by RT-qPCR and normalized to the vehicle (nonane) which is 1 for each cell line. Four independent experiments were performed in duplicate, error bars represent SD. Statistical significances relative to the vehicle were examined: ANOVA with Dunnett's multiple comparison post-test, \* $p$ -value < 0,05.

**Table S1: Cell viability assays. A) Neutral Red Uptake Assays and B) Alamar Blue Assays** for each molecule tested on Cos-7 cells. C) Percentage of transfected cell viability compared to the non-transfected cells for the two assays. D) PI/Hoechst Assay. All assays were performed in six independent experiments. Alamar Blue assays without cells were performed in parallel to evaluate the percentage of Alamar Blue reagent reduction of each molecule. Statistical significances relative to the vehicle were examined: \*  $p$ -value < 0,05; \*\*  $p$ -value < 0,01; \*\*\*  $p$ -value < 0,001

| A                |                      |               |                     |      |         | B                |                      |               |                     |      |         |
|------------------|----------------------|---------------|---------------------|------|---------|------------------|----------------------|---------------|---------------------|------|---------|
| Solvent          | Molecule             | Concentration | % of cell viability | SD   | p-value | Solvent          | Molecule             | Concentration | % of cell viability | SD   | p-value |
| DMSO             | Hydroquinone         | 50 $\mu$ M    | 111,11              | 0,22 |         | DMSO             | Hydroquinone         | 50 $\mu$ M    | 70,88               | 0,11 | **      |
|                  | 3-methylcholanthrene | 0,5 $\mu$ M   | 104,25              | 0,08 |         |                  | 3-methylcholanthrene | 0,5 $\mu$ M   | 99,41               | 0,05 |         |
|                  |                      | 5 $\mu$ M     | 102,26              | 0,10 |         |                  |                      | 5 $\mu$ M     | 101,57              | 0,13 |         |
|                  | Benzo(a)pyrene       | 0,5 $\mu$ M   | 107,74              | 0,20 |         |                  | Benzo(a)pyrene       | 0,5 $\mu$ M   | 88,31               | 0,09 | **      |
|                  | Fluoranthene         | 50 $\mu$ M    | 86,13               | 0,09 | **      |                  | Fluoranthene         | 50 $\mu$ M    | 63,85               | 0,06 | ***     |
|                  |                      | 100 $\mu$ M   | 84,40               | 0,09 | **      |                  |                      | 100 $\mu$ M   | 61,71               | 0,06 | ***     |
|                  | CH223191             | 1 $\mu$ M     | 118,25              | 0,11 | *       |                  | CH223191             | 1 $\mu$ M     | 100,43              | 0,07 |         |
|                  | FICZ                 | 50 nM         | 105,53              | 0,15 |         |                  | FICZ                 | 50 nM         | 98,52               | 0,07 |         |
|                  |                      | 100 nM        | 96,25               | 0,04 |         |                  |                      | 100 nM        | 101,50              | 0,13 |         |
|                  | S8202190             | 30 $\mu$ M    | 88,84               | 0,19 |         |                  | S8202190             | 30 $\mu$ M    | 89,28               | 0,11 |         |
|                  | Curcumin             | 100 $\mu$ M   | 124,38              | 0,18 | *       |                  | Curcumin             | 100 $\mu$ M   | 97,61               | 0,07 |         |
|                  | Clotrimazole         | 5 $\mu$ M     | 130,83              | 0,29 |         |                  | Clotrimazole         | 5 $\mu$ M     | 95,53               | 0,09 |         |
|                  | Indole               | 250 $\mu$ M   | 110,30              | 0,05 | *       |                  | Indole               | 250 $\mu$ M   | 96,10               | 0,04 |         |
|                  | Forskolin            | 1 $\mu$ M     | 101,97              | 0,21 |         |                  | Forskolin            | 1 $\mu$ M     | 105,10              | 0,14 |         |
|                  | Leflunomide          | 10 $\mu$ M    | 104,02              | 0,08 |         |                  | Leflunomide          | 10 $\mu$ M    | 99,21               | 0,03 |         |
|                  |                      | 30 $\mu$ M    | 91,31               | 0,11 |         |                  |                      | 30 $\mu$ M    | 95,18               | 0,07 |         |
| H <sub>2</sub> O | Cobalt Chloride      | 200 $\mu$ M   | 107,11              | 0,10 |         | H <sub>2</sub> O | Cobalt Chloride      | 200 $\mu$ M   | 100,19              | 0,09 |         |
|                  | LPS E. coli          | 2 $\mu$ g/mL  | 109,39              | 0,09 | *       |                  | LPS E. coli          | 2 $\mu$ g/mL  | 98,87               | 0,09 |         |
|                  | Chloroquine          | 10 $\mu$ M    | 107,66              | 0,12 |         |                  | Chloroquine          | 10 $\mu$ M    | 99,86               | 0,09 |         |
| Ethanol          | Phenazine            | 50 $\mu$ M    | 95,87               | 0,11 |         | Ethanol          | Phenazine            | 50 $\mu$ M    | 102,06              | 0,03 |         |
| Nonane           | TCDD                 | 10 nM         | 96,95               | 0,01 | **      |                  |                      |               |                     |      |         |

  

| C                                        |                     |      |         | D       |           |               |         |
|------------------------------------------|---------------------|------|---------|---------|-----------|---------------|---------|
| Transfected cells/ non-transfected cells | % of cell viability | SD   | p-value | Solvent | Molecule  | Concentration | p-value |
| Neutral Red Uptake Assay                 | 81,50 %             | 0,17 | *       | Ethanol | Pyocyanin | 50 $\mu$ M    | 91,80   |
| Alamar Blue Assay                        | 81,40 %             | 0,06 | ***     |         |           | 100 $\mu$ M   | 88,57   |

**Table S2: Firefly luciferase inhibitory assay.** Molecules were tested on purified firefly luciferase to evaluate their capacity to inhibit the enzyme. The Firefly luciferase inhibitor  $\beta$ -naphthoflavone was used as a positive control of the assay. Six independent assays were performed in triplicate and statistical significances relative to the control (vehicle: DMSO or water) were examined: \*  $p$ -value < 0,05; \*\*  $p$ -value < 0,01; \*\*\*  $p$ -value < 0,001.

| Solvent          | Molecule                | Concentration | % of Firefly luciferase activity | SD   | $p$ -value |
|------------------|-------------------------|---------------|----------------------------------|------|------------|
| DMSO             | $\beta$ -naphthoflavone | 1 $\mu$ M     | 13,07                            | 0,01 | ***        |
|                  | Hydroquinone            | 50 $\mu$ M    | 100,99                           | 0,04 |            |
|                  | 3-methylcholanthrene    | 0,5 $\mu$ M   | 97,49                            | 0,06 |            |
|                  |                         | 5 $\mu$ M     | 80,61                            | 0,06 | **         |
|                  | Benzo(a)pyrene          | 0,5 $\mu$ M   | 104,35                           | 0,05 |            |
|                  |                         | 50 $\mu$ M    | 99,98                            | 0,04 |            |
|                  | Fluoranthene            | 100 $\mu$ M   | 97,14                            | 0,04 |            |
|                  |                         | 1 $\mu$ M     | 103,66                           | 0,13 |            |
|                  | FICZ                    | 50 nM         | 98,61                            | 0,05 |            |
|                  |                         | 100 nM        | 92,48                            | 0,06 |            |
|                  | SB202190                | 30 $\mu$ M    | 101,50                           | 0,08 |            |
|                  | Curcumin                | 100 $\mu$ M   | 100,28                           | 0,13 |            |
|                  | Clotrimazole            | 5 $\mu$ M     | 100,91                           | 0,07 |            |
|                  | Indole                  | 250 $\mu$ M   | 97,61                            | 0,02 | *          |
|                  | Forskolin               | 1 $\mu$ M     | 105,85                           | 0,05 |            |
|                  |                         | 10 $\mu$ M    | 100,74                           | 0,06 |            |
|                  | Leflunomide             | 30 $\mu$ M    | 97,16                            | 0,03 |            |
| H <sub>2</sub> O | Cobalt Chloride         | 200 $\mu$ M   | 96,69                            | 0,04 |            |
|                  | LPS E. coli             | 2 $\mu$ g/mL  | 101,05                           | 0,07 |            |
|                  | Chloroquine             | 10 $\mu$ M    | 105,02                           | 0,08 |            |
| Ethanol          | Phenazine               | 50 $\mu$ M    | 94,20                            | 0,04 | *          |
|                  | Pyocyanin               | 50 $\mu$ M    | 81,67                            | 0,05 | ***        |
|                  |                         | 100 $\mu$ M   | 77,01                            | 0,12 | ***        |
| Nonane           | TCDD                    | 10 nM         | 93,38                            | 0,05 | *          |

**Table S3: Tested compounds with no significant effect.** Molecules were tested on the screening model. Three independent experiments were performed in duplicate; fold induction is standardized to the vehicle, which is 1.

| Molecule                          | Concentration | Fold induction | SD   | $p$ -value | Molecule            | Concentration | Fold induction | SD   | $p$ -value |
|-----------------------------------|---------------|----------------|------|------------|---------------------|---------------|----------------|------|------------|
| 2-aminoanthracène                 | 10 $\mu$ M    | 1,33           | 0,53 | ns         | E. Coli pellet      | 25 $\mu$ L    | 1,24           | 0,66 | ns         |
| 3-phenylpropionic acid            | 10 $\mu$ M    | 0,70           | 0,29 | ns         | Flagellin           | 100 ng/mL     | 0,90           | 0,40 | ns         |
|                                   | 50 $\mu$ M    | 0,87           | 0,38 | ns         | Dibutryl-AMPC       | 2 $\mu$ M     | 1,03           | 0,44 | ns         |
| 3-(4-hydroxyphenyl)propionic acid | 10 $\mu$ M    | 1,13           | 0,76 | ns         | 3-3'diindolomethane | 10 $\mu$ M    | 1,26           | 0,31 | ns         |
|                                   | 50 $\mu$ M    | 1,18           | 0,66 | ns         | Biliverdin          | 16 $\mu$ M    | 0,88           | 0,58 | ns         |
| Indole-3-carboxaldehyde           | 10 $\mu$ M    | 0,88           | 0,09 | ns         |                     | 32 $\mu$ M    | 0,88           | 0,38 | ns         |
|                                   | 50 $\mu$ M    | 1,03           | 0,11 | ns         | Colchicin           | 1 nM          | 1,19           | 0,34 | ns         |
| Indole-3-propionic acid           | 10 $\mu$ M    | 0,78           | 0,18 | ns         |                     | 1 $\mu$ M     | 1,14           | 0,26 | ns         |
|                                   | 50 $\mu$ M    | 0,99           | 0,40 | ns         | Genistein           | 1 $\mu$ M     | 1,09           | 0,34 | ns         |
| Kynurenic acid                    | 10 $\mu$ M    | 1,01           | 0,14 | ns         |                     | 10 $\mu$ M    | 1,07           | 0,09 | ns         |
|                                   | 50 $\mu$ M    | 0,89           | 0,08 | ns         | Indigo              | 0,1 $\mu$ M   | 0,92           | 0,37 | ns         |
| Tryptamine                        | 10 $\mu$ M    | 0,98           | 0,16 | ns         |                     | 1 $\mu$ M     | 0,92           | 0,31 | ns         |
|                                   | 50 $\mu$ M    | 1,03           | 0,13 | ns         | ITE                 | 1 $\mu$ M     | 0,97           | 0,22 | ns         |
| Tryptophan                        | 0,1 $\mu$ M   | 0,90           | 0,07 | ns         |                     | 10 $\mu$ M    | 1,01           | 0,22 | ns         |
|                                   | 1 $\mu$ M     | 0,84           | 0,07 | ns         | Lumichrome          | 1 $\mu$ M     | 0,79           | 0,09 | ns         |
|                                   | 5 $\mu$ M     | 1,00           | 0,27 | Ns         |                     | 10 $\mu$ M    | 1,10           | 0,18 | ns         |
| Resveratrol                       | 0,01 $\mu$ M  | 1,00           | 0,03 | ns         | Pyridazine          | 5 mg/mL       | 0,96           | 0,20 | ns         |
|                                   | 0,1 $\mu$ M   | 1,09           | 0,16 | ns         |                     | 50 mg/mL      | 0,85           | 0,31 | ns         |
|                                   | 1 $\mu$ M     | 1,05           | 0,44 | ns         |                     | 500 mg/mL     | 0,92           | 0,26 | ns         |
| Quercetin                         | 1 $\mu$ M     | 0,98           | 0,15 | ns         | TCDD                | 10 nM         | 1,02           | 0,01 | ns         |
|                                   | 10 $\mu$ M    | 0,87           | 0,47 | ns         |                     |               |                |      |            |

**Table S4: Primers used for the quantitative real-time polymerase chain reaction.**

| Genes           | Primer sequences (5' - 3') |
|-----------------|----------------------------|
| gcy-32          | TCCCGTGTCAAAAACCTCC        |
|                 | AGCCATTCCAAGAGATTCC        |
| gcy-33          | CTTCCTTCAGCGACACCTTC       |
|                 | GATCCTGCCATACTGGATCG       |
| gcy-35          | ATTACTCGAAGCGCAGTGGT       |
|                 | TGCATCCAAATGTTCTGT         |
| gcy-36          | TGAAGCAGCAAAAAGGGTTT       |
|                 | CAGTTCCAAGAGCCTCCTCA       |
| cyp-13a10       | TGTTCTCGGCTCAAGGATT        |
|                 | ATTCCATCGCACTGTCTTCC       |
| cyp-13a1        | CGCATTGGAGTTGTTGAGG        |
|                 | TTTGAGAATCAGTTTGACCCATT    |
| flp-8           | ACCACCGAGAATGAGAAGGA       |
|                 | CGTCACTGCGTTTTCCAA         |
| ahr (human)     | ACATCACCTACGCCAGTCGC       |
|                 | TCTATGCCGCTTGGAAGGAT       |
| arnt (human)    | ACCAGCCACAGTCTGAATG        |
|                 | TCTCCTTGAGCCCATACAC        |
| cyp-1a1 (human) | GATCAAGGAGCACTACAAAACC     |
|                 | TGGATATTAGCGTTCTCAT        |
